# Supplementary material for: Promoting hydrogen evolution of a g-C3N4-based photocatalyst by indium and phosphorus co-doping
Source: Royal Society of Chemistry journal article supplement (doi:10.1039/d1nj00585e), 2021-01-01
Supplement: d1nj00585e1.pdf [file d1nj00585e1.pdf]

Electronic Supplementary Material (ESI) for New Journal of Chemistry.

## Promoting Hydrogen Evolution of g-C<sub>3</sub>N<sub>4</sub> Based Photocatalyst by Indium and Phosphorus Co-doping

Xiaohang Yang,<sup>a</sup> Chi Cao,<sup>a</sup> Zilong Guo,<sup>b</sup> Xiaoyu Zhang,<sup>a</sup> Yaxin Wang<sup>b</sup> and Wensheng Yang<sup>\*,a,b</sup>

<sup>a</sup> State Key Laboratory of Inorganic Synthesis and Preparative Chemistry, College of Chemistry, Jilin University, Changchun 130012, China

<sup>b</sup> Institute of Molecular Plus, Tianjin University, Tianjin 300072, China

E-mail: [wsyang@jlu.edu.cn](mailto:wsyang@jlu.edu.cn)

### Contents

|                                                                                                                                                                                                                                               |     |
|-----------------------------------------------------------------------------------------------------------------------------------------------------------------------------------------------------------------------------------------------|-----|
| 1. SEM images of g-C <sub>3</sub> N <sub>4</sub> , In-g-C <sub>3</sub> N <sub>4</sub> , P-g-C <sub>3</sub> N <sub>4</sub> and In,P-g-C <sub>3</sub> N <sub>4</sub> photocatalysts.                                                            | S2  |
| 2. TEM images of g-C <sub>3</sub> N <sub>4</sub> , In-g-C <sub>3</sub> N <sub>4</sub> , P-g-C <sub>3</sub> N <sub>4</sub> and In,P-g-C <sub>3</sub> N <sub>4</sub> photocatalysts.                                                            | S3  |
| 3. Tapping-mode AFM image and height curve of In,P-g-C <sub>3</sub> N <sub>4</sub> photocatalyst.                                                                                                                                             | S4  |
| 4. Contents of C and N elements and the corresponding molar ratio of g-C <sub>3</sub> N <sub>4</sub> , In-g-C <sub>3</sub> N <sub>4</sub> , P-g-C <sub>3</sub> N <sub>4</sub> and In,P-g-C <sub>3</sub> N <sub>4</sub> photocatalysts.        | S5  |
| 5. Comparison in quantum efficiency of different photocatalysts.                                                                                                                                                                              | S6  |
| 6. TEM image and XRD pattern of In,P-g-C <sub>3</sub> N <sub>4</sub> photocatalyst after cyclic H <sub>2</sub> generation reaction.                                                                                                           | S7  |
| 7. High resolution XPS spectra of In,P-g-C <sub>3</sub> N <sub>4</sub> photocatalyst after cyclic H <sub>2</sub> generation reaction.                                                                                                         | S8  |
| 8. Nitrogen adsorption-desorption isotherms and size distribution curves of g-C <sub>3</sub> N <sub>4</sub> , In-g-C <sub>3</sub> N <sub>4</sub> , P-g-C <sub>3</sub> N <sub>4</sub> and In,P-g-C <sub>3</sub> N <sub>4</sub> photocatalysts. | S9  |
| 9. Surface areas, pore volumes and average pore sizes of g-C <sub>3</sub> N <sub>4</sub> , In-g-C <sub>3</sub> N <sub>4</sub> , P-g-C <sub>3</sub> N <sub>4</sub> and In,P-g-C <sub>3</sub> N <sub>4</sub> photocatalysts.                    | S10 |
| 10. Photoluminescence spectra of g-C <sub>3</sub> N <sub>4</sub> , In-g-C <sub>3</sub> N <sub>4</sub> , P-g-C <sub>3</sub> N <sub>4</sub> and In,P-g-C <sub>3</sub> N <sub>4</sub> photocatalysts.                                            | S11 |
| 11. Transient emission decays of g-C <sub>3</sub> N <sub>4</sub> , In-g-C <sub>3</sub> N <sub>4</sub> , P-g-C <sub>3</sub> N <sub>4</sub> and In,P-g-C <sub>3</sub> N <sub>4</sub> photocatalysts.                                            | S12 |
| 12. Mott-Schottky plots of g-C <sub>3</sub> N <sub>4</sub> , In-g-C <sub>3</sub> N <sub>4</sub> , P-g-C <sub>3</sub> N <sub>4</sub> and In,P-g-C <sub>3</sub> N <sub>4</sub> photocatalysts.                                                  | S13 |
| 13. The calculated band structure of g-C <sub>3</sub> N <sub>4</sub> , In-g-C <sub>3</sub> N <sub>4</sub> , P-g-C <sub>3</sub> N <sub>4</sub> and In,P-g-C <sub>3</sub> N <sub>4</sub> photocatalysts.                                        | S14 |

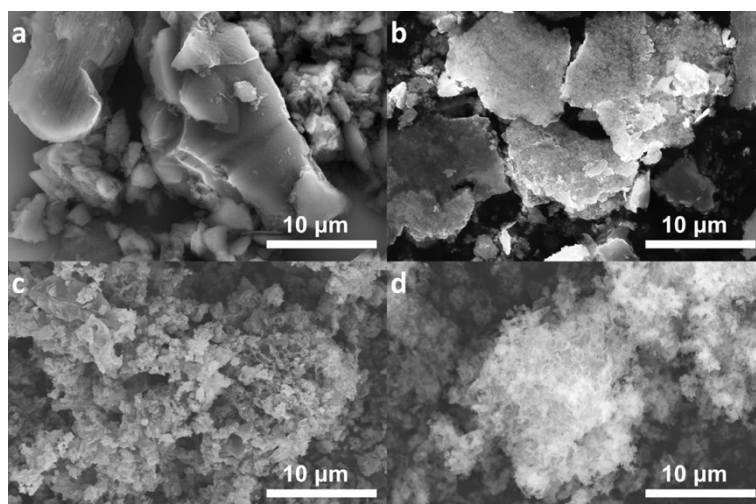

**Fig. S1** SEM images of (a)  $\text{g-C}_3\text{N}_4$ , (b)  $\text{In-g-C}_3\text{N}_4$ , (c)  $\text{P-g-C}_3\text{N}_4$  and (d)  $\text{In,P-g-C}_3\text{N}_4$  photocatalysts. The  $\text{g-C}_3\text{N}_4$  and  $\text{In-g-C}_3\text{N}_4$  photocatalysts showed the similar sheet-like structure, which was absent in the images of the  $\text{P-g-C}_3\text{N}_4$  and  $\text{In,P-g-C}_3\text{N}_4$  photocatalysts, meaning the doping of indium have little effect on the layered structure and the doping of phosphorus destroy the layered structure to some extent.

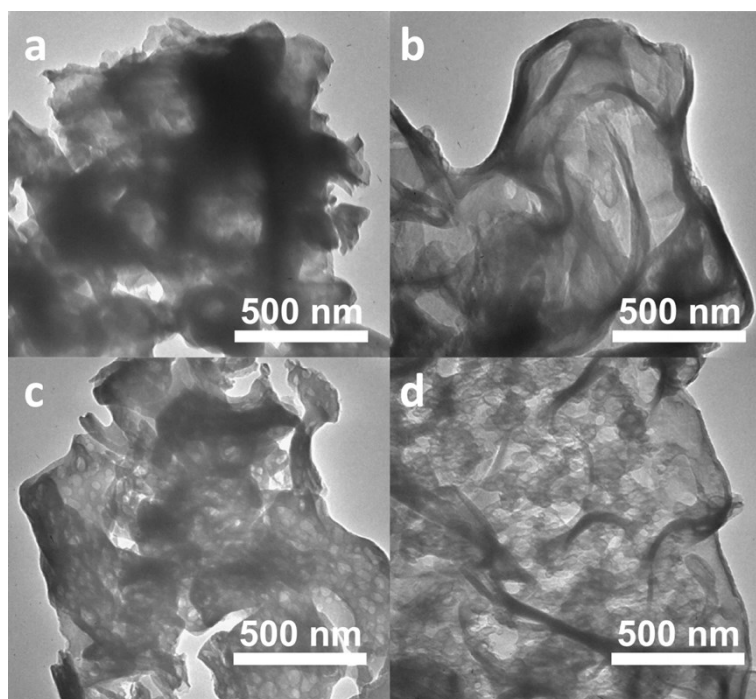

**Fig. S2** TEM images of (a) g-C<sub>3</sub>N<sub>4</sub>, (b) In-g-C<sub>3</sub>N<sub>4</sub>, (c) P-g-C<sub>3</sub>N<sub>4</sub> and (d) In,P-g-C<sub>3</sub>N<sub>4</sub> photocatalysts. The typical two-dimensional sheet-like structure of g-C<sub>3</sub>N<sub>4</sub> was observable for all the photocatalysts, meaning remaining of the layered structure upon the indium and/or phosphorus doping, consistent with the XRD results (see Fig. 2 in the text).

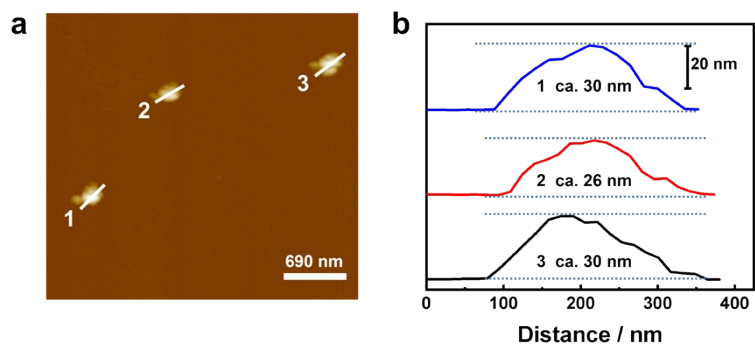

**Fig. S3** (a) Tapping-mode AFM image of the In,P-g-C<sub>3</sub>N<sub>4</sub> photocatalyst deposited on silicon wafer substrate and (b) Variation in height of the photocatalyst along the labeled lines. Lateral dimension of the photocatalyst was measured to be ca. 280 nm and its thickness was determined to be ca. 28 nm.

**Table S1** Contents of C and N elements and the corresponding molar ratio of C and N in the g-C<sub>3</sub>N<sub>4</sub>, P-g-C<sub>3</sub>N<sub>4</sub>, In-g-C<sub>3</sub>N<sub>4</sub> and In,P-g-C<sub>3</sub>N<sub>4</sub> photocatalysts.

| Photocatalyst                        | C      | N      | C/N       |
|--------------------------------------|--------|--------|-----------|
|                                      | (wt.%) | (wt.%) | (mol/mol) |
| g-C <sub>3</sub> N <sub>4</sub>      | 33.83  | 54.96  | 0.7181    |
| P-g-C <sub>3</sub> N <sub>4</sub>    | 22.87  | 41.31  | 0.6458    |
| In-g-C <sub>3</sub> N <sub>4</sub>   | 32.23  | 52.79  | 0.7123    |
| In,P-g-C <sub>3</sub> N <sub>4</sub> | 28.46  | 51.67  | 0.6426    |

**Table S2** Comparison in quantum efficiency (QE) of different g-C<sub>3</sub>N<sub>4</sub>-based photocatalysts and the standard photocatalysts (Degussa P25 and CdS) at the monochromatic irradiation wavelength of 420 nm.

| Catalyst                                 | Doped element      | Quantum efficiency (%) | Ref.                |
|------------------------------------------|--------------------|------------------------|---------------------|
| In-g-C <sub>3</sub> N <sub>4</sub>       | In <sup>3+</sup>   | 6.79                   | Ref. 18 in the text |
| Zn-g-C <sub>3</sub> N <sub>4</sub>       | Zn <sup>2+</sup>   | 3.20                   | Ref. 34 in the text |
| I-g-C <sub>3</sub> N <sub>4</sub>        | I                  | 2.40                   | Ref. 35 in the text |
| P-g-C <sub>3</sub> N <sub>4</sub>        | P                  | 3.56                   | Ref. 36 in the text |
| Na,P-g-C <sub>3</sub> N <sub>4</sub>     | Na <sup>+</sup> ,P | 6.80                   | Ref. 17 in the text |
| <b>In,P-g-C<sub>3</sub>N<sub>4</sub></b> | <b>In,P</b>        | <b>8.02</b>            | <b>This work</b>    |
| P25                                      | --                 | --                     | Ref. 32 in the text |
| CdS                                      | --                 | 0.38                   | Ref. 33 in the text |

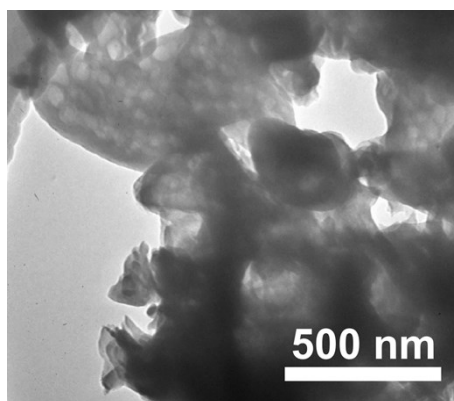

**Fig. S4** TEM image of the In,P-g-C<sub>3</sub>N<sub>4</sub> photocatalyst after four cycles of the H<sub>2</sub> generation reaction. No obvious changes in morphology of the In,P-g-C<sub>3</sub>N<sub>4</sub> photocatalyst could be observed after the reaction (see Fig. S2 for comparison).

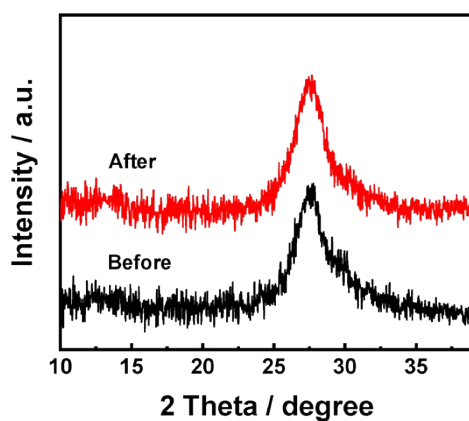

**Fig. S5** Comparison in XRD patterns of the In,P-g-C<sub>3</sub>N<sub>4</sub> photocatalyst before (black) and after (red) four cycles of the H<sub>2</sub> generation reaction. There were almost no differences in position and intensity of XRD peaks for the photocatalyst before and after the reaction.

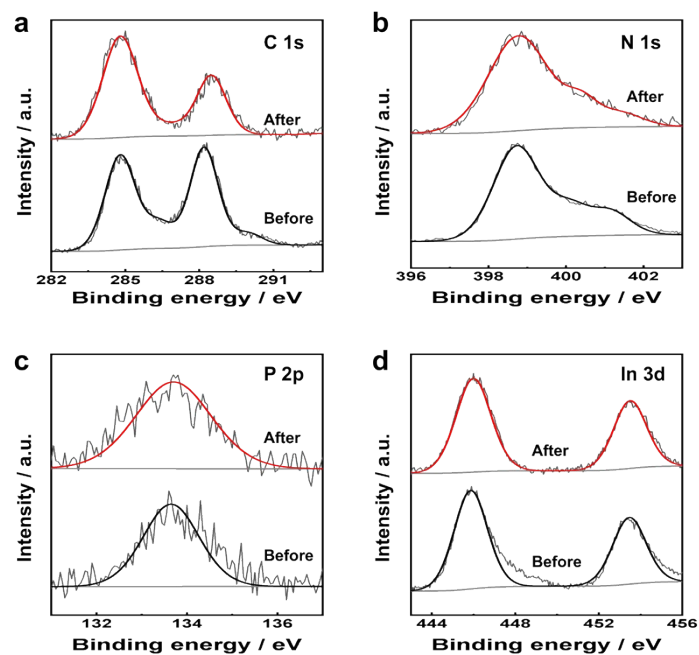

**Fig. S6** Comparison in high resolution (a) C 1s, (b) N 1s, (c) P 2p, and (d) In 3d XPS spectra of the In,P-g-C<sub>3</sub>N<sub>4</sub> photocatalyst before (black) and after (red) four cycles of the  $H_2$  generation reaction. There were almost no changes in XPS spectra of the photocatalyst before and after the reaction.

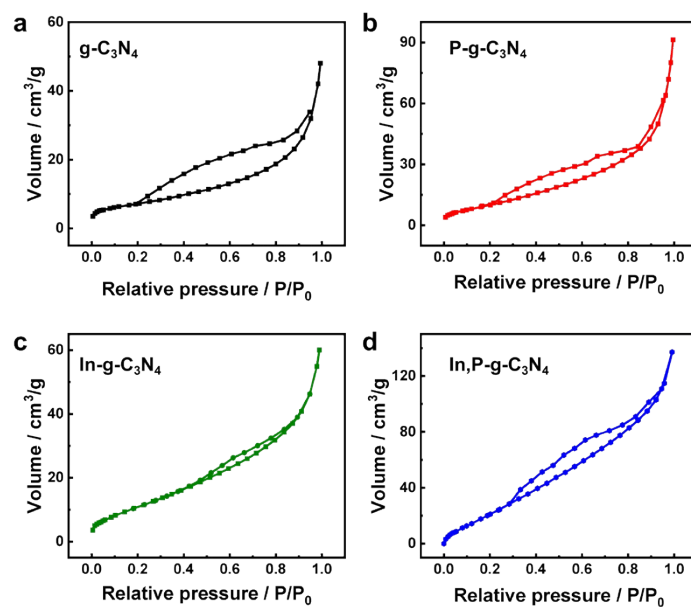

**Fig. S7** Nitrogen adsorption-desorption isotherms of the (a)  $\text{g-C}_3\text{N}_4$ , (b)  $\text{P-g-C}_3\text{N}_4$ , (c)  $\text{In-g-C}_3\text{N}_4$  and (d)  $\text{In,P-g-C}_3\text{N}_4$  photocatalysts (see Table S3 for the derived surface areas and pore volumes).

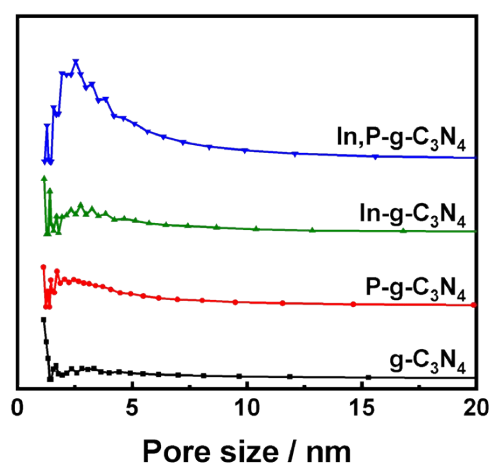

**Fig. S8** Size distribution curves of the  $\text{g-C}_3\text{N}_4$ ,  $\text{P-g-C}_3\text{N}_4$ ,  $\text{In-g-C}_3\text{N}_4$  and  $\text{In,P-g-C}_3\text{N}_4$  photocatalysts (see Table S3 for the derived average pore sizes).

**Table S3** Surface areas, pore volumes and average pore sizes of the g-C<sub>3</sub>N<sub>4</sub>, P-g-C<sub>3</sub>N<sub>4</sub>, In-g-C<sub>3</sub>N<sub>4</sub> and In,P-g-C<sub>3</sub>N<sub>4</sub> photocatalysts.

| Sample                               | Surface area<br>(m <sup>2</sup> ·g <sup>-1</sup> ) | Pore volume<br>(cm <sup>3</sup> ·g <sup>-1</sup> ) | Average pore size<br>(nm) |
|--------------------------------------|----------------------------------------------------|----------------------------------------------------|---------------------------|
| g-C <sub>3</sub> N <sub>4</sub>      | 24.91                                              | 0.07                                               | 1.65                      |
| P-g-C <sub>3</sub> N <sub>4</sub>    | 37.05                                              | 0.14                                               | 2.46                      |
| In-g-C <sub>3</sub> N <sub>4</sub>   | 34.81                                              | 0.09                                               | 2.27                      |
| In,P-g-C <sub>3</sub> N <sub>4</sub> | 73.57                                              | 0.21                                               | 2.77                      |

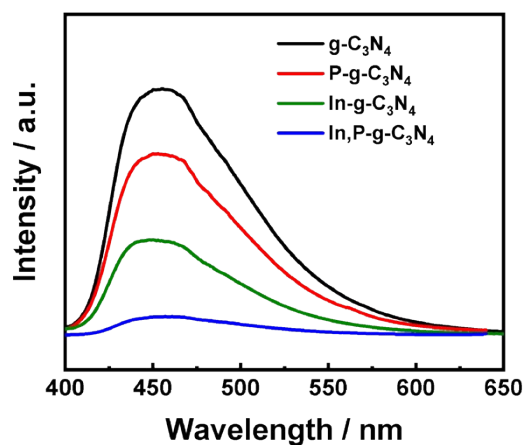

**Fig. S9** Photoluminescence spectra of the g-C<sub>3</sub>N<sub>4</sub>, P-g-C<sub>3</sub>N<sub>4</sub>, In-g-C<sub>3</sub>N<sub>4</sub> and In,P-g-C<sub>3</sub>N<sub>4</sub> photocatalysts. Intensity of the emission peak of g-C<sub>3</sub>N<sub>4</sub> at 452 nm decreased upon the doping of indium or phosphorus, indicating the indium or phosphorus doping is effective to suppress the recombination of photogenerated electron-hole pairs. The emission was weakened greatly in the In,P-g-C<sub>3</sub>N<sub>4</sub>, implying the synergistic effect of In and P doping on improving the separation efficiency of photogenerated charge carriers.

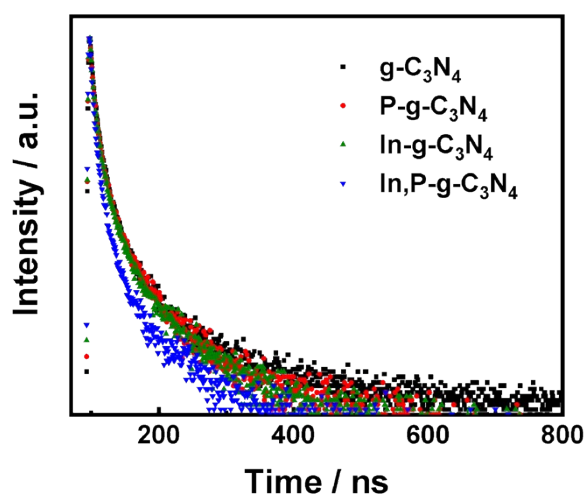

**Fig. S10** Time-resolved photoluminescence decay spectra of the g-C<sub>3</sub>N<sub>4</sub>, P-g-C<sub>3</sub>N<sub>4</sub>, In-g-C<sub>3</sub>N<sub>4</sub> and In,P-g-C<sub>3</sub>N<sub>4</sub> photocatalysts. The triexponential decay function was utilized to fit the curves (see Table S4 for the fitting results).

**Table S4.** Room temperature transient fluorescence decay of g-C<sub>3</sub>N<sub>4</sub>, P-g-C<sub>3</sub>N<sub>4</sub>, In-g-C<sub>3</sub>N<sub>4</sub> and In,P-g-C<sub>3</sub>N<sub>4</sub> catalysts.

| Samples                              | Parameters | Lifetime (ns) | Relative percentage (%) | Average lifetime (ns) |
|--------------------------------------|------------|---------------|-------------------------|-----------------------|
| g-C <sub>3</sub> N <sub>4</sub>      | $\tau_1$   | 9.11          | 38.25                   | 3.34                  |
|                                      | $\tau_2$   | 63.48         | 10.92                   |                       |
|                                      | $\tau_3$   | 1.98          | 50.83                   |                       |
| P-g-C <sub>3</sub> N <sub>4</sub>    | $\tau_1$   | 9.08          | 38.01                   | 3.14                  |
|                                      | $\tau_2$   | 62.02         | 11.98                   |                       |
|                                      | $\tau_3$   | 1.82          | 50.00                   |                       |
| In-g-C <sub>3</sub> N <sub>4</sub>   | $\tau_1$   | 8.11          | 38.90                   | 2.90                  |
|                                      | $\tau_2$   | 57.02         | 12.16                   |                       |
|                                      | $\tau_3$   | 1.66          | 48.94                   |                       |
| In,P-g-C <sub>3</sub> N <sub>4</sub> | $\tau_1$   | 6.05          | 33.27                   | 1.95                  |
|                                      | $\tau_2$   | 49.27         | 10.30                   |                       |
|                                      | $\tau_3$   | 1.24          | 56.43                   |                       |

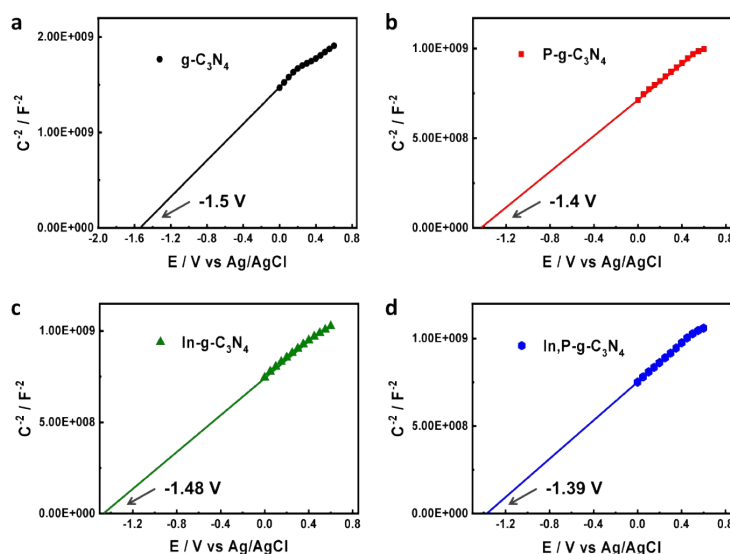

**Fig. S11** Mott-Schottky plots of the (a) g-C<sub>3</sub>N<sub>4</sub>, (b) P-g-C<sub>3</sub>N<sub>4</sub>, (c) In-g-C<sub>3</sub>N<sub>4</sub> and (d) In,P-g-C<sub>3</sub>N<sub>4</sub> photocatalysts. According to the X intercepts at the tangents of plots, flat band potentials ( $E_{fb}$ ) of the g-C<sub>3</sub>N<sub>4</sub>, P-g-C<sub>3</sub>N<sub>4</sub>, In-g-C<sub>3</sub>N<sub>4</sub> and In,P-g-C<sub>3</sub>N<sub>4</sub> photocatalysts were derived to be -1.50, -1.40, -1.48 and -1.39 V (vs. Ag/AgCl), and -0.91, -0.81, -0.89 and -0.80 V (vs. NHE, pH=0), respectively (see Ref. 32 in the text). By assuming the conduction band minimum (CBM) of the n-type semiconductor be 0.1 V more negative than the  $E_{fb}$  values (see Ref. 32 in the text), the corresponding CBM potentials of the g-C<sub>3</sub>N<sub>4</sub>, P-g-C<sub>3</sub>N<sub>4</sub>, In-g-C<sub>3</sub>N<sub>4</sub> and In,P-g-C<sub>3</sub>N<sub>4</sub> photocatalysts were thus derived to be -1.01, -0.91, -0.99 and -0.90 V (vs. NHE, pH=0), respectively.

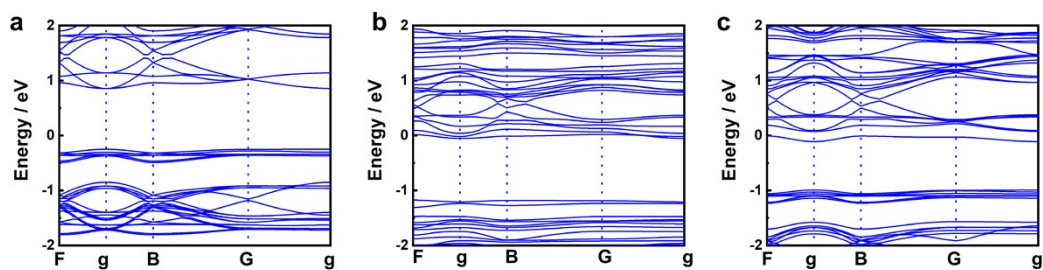

**Fig. S12** The calculated band structures of the (a) g-C<sub>3</sub>N<sub>4</sub>, (b) In-g-C<sub>3</sub>N<sub>4</sub> and (c) P-g-C<sub>3</sub>N<sub>4</sub> photocatalysts. The corresponding total density of states (TDOS) and projected density of states (pDOS) contributed by orbitals of the constituent atoms were shown in Fig.7 in the text.
